# Supplementary material for: A paper-based skin patch for the diagnostic screening of cystic fibrosis
Source: Royal Society of Chemistry journal article supplement (doi:10.1039/c5cc00717h), 2015-01-01
Supplement: c5cc00717h1.pdf [file c5cc00717h1.pdf]

## **Paper-based skin patch for the diagnostic screening of cystic fibrosis**

**Xuan Mu,<sup>\*a</sup> Xiaolei Xin,<sup>a</sup> Chengyan Fan,<sup>a</sup> Xue Li,<sup>b</sup> Xinlun Tian,<sup>\*b</sup> Kai-Feng Xu<sup>b</sup>  
and Zhi Zheng<sup>\*a</sup>**

*<sup>1</sup>Institute of Basic Medical Sciences Chinese Academy of Medical Sciences*

*School of Basic Medicine Peking Union Medical College, 5 Dongdan Santiao, 100005, Beijing,*

*China. Tel: 86-10-65156952; E-mail: [mux@ibms.pumc.edu.cn](mailto:mux@ibms.pumc.edu.cn); Fax/Tel: 86-10-65156961; E-mail:*

*[zhizheng10@yahoo.com](mailto:zhizheng10@yahoo.com);*

*<sup>2</sup> Department of Respiratory Medicine, Peking Union Medical College Hospital, Chinese*

*Academy of Medical Sciences and Peking Union Medical College, 100730, Beijing, China.*

*Fax/Tel: 86-10-69155030; E-mail: [xinlun\\_t@sina.com](mailto:xinlun_t@sina.com).*

### **Materials and Instruments**

DE 81 Ion exchange paper and Chr 1 paper (Whatman, GE, US); 1624W Tegaderm and Scotch tape (3M, US); Pilocarpine Nitrate (meets USP test specifications), Sodium Chloride, Sodium L-lactate, and Sodium Bicarbonate (Sigma-Aldrich, US); pH test paper with a range of 1 to 14 (Hangzhou Special Paper Co., Ltd, China); GC-YS-107 Water Sensitive Ink (Gocolor S.Z. Chemical Co., Ltd, China); MK40 Softbox for providing a controlled light source (Shentu, China); ABL850 Analyzer (Radiometer, Denmark); Hole Punchers with the size of 2 mm, 4 mm and 5 mm; Samsung GT-I9300; Canon Powershot A700.

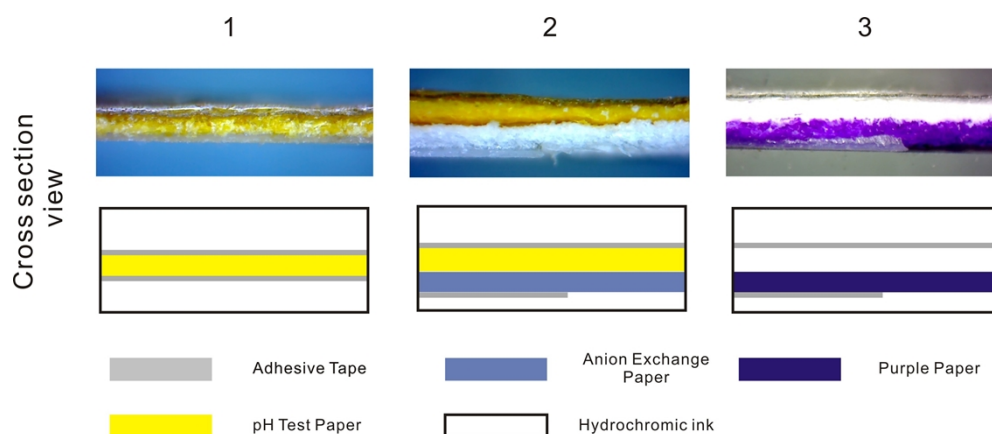

Figure S1. The cross-sectional schematics and images of three sections of the paper-based skin patch. The images also show part of holes on the adhesive tape.

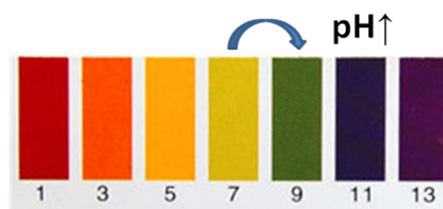

Figure S2. The schematics show the range of the pH test paper. The blue arrow indicates the color change of the section 2 of the skin patch.

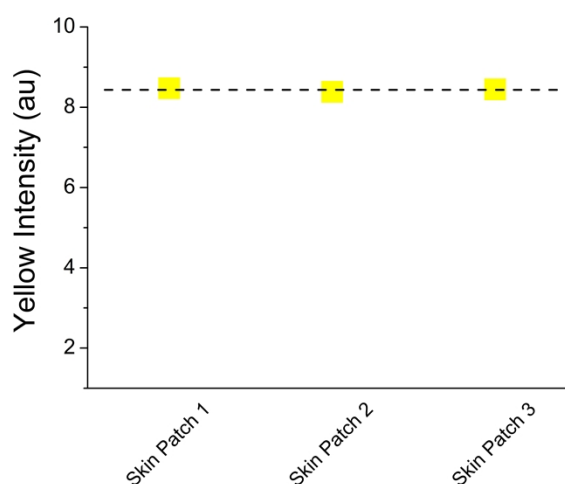

Figure S3. The mean intensity of yellow color (in CMYK) of the section 1 of three skin patches in the controlled light box. The color intensity shows a high consistency with a CV of 0.5%, demonstrating a controlled light source. The dash line indicates the average intensity.

## Supplementary information

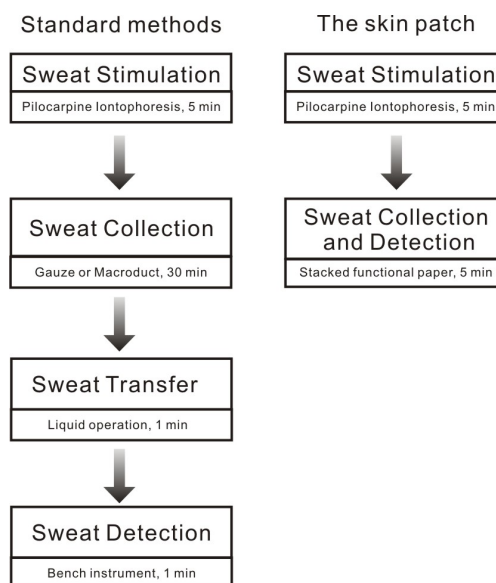

Figure S4. The different operating procedures of standard diagnostic methods and the paper-based skin patch. The standard methods have multiple steps involving lengthy collection and troublesome liquid transferring. On the contrary, the skin patch has streamlined and integrated steps, showing more efficiency and less risk of evaporation errors.

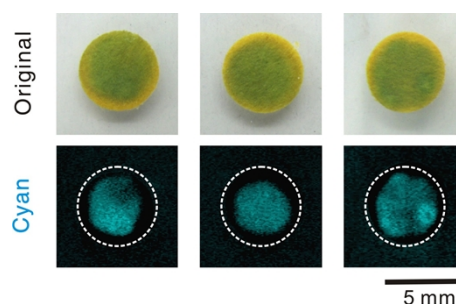

Figure S5. Triplicate experiments of detecting chloride solution (1.5  $\mu$ L, 100 mM) on the skin patch. The coefficient variation is about 9.6%.

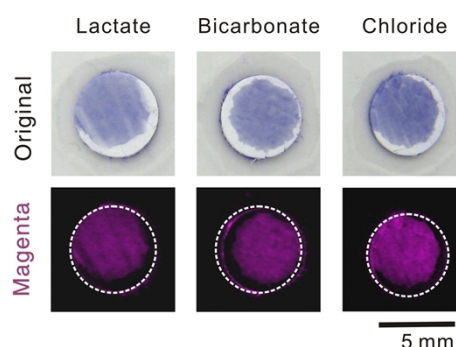

Figure S6. The colorimetric results of measuring volume of different anion solutions (1.5  $\mu$ L, 10 mM) on the section 3 of the skin patch. Because the hydrochromic ink is specifically triggered by water, the measured volume seems not to be influenced by anions. The coefficient variation is about 13.8% that is similar to the overall variations of color (magenta) detection.

**Table S1. Technical comparison of the skin patch and the reference methods**

|                                           |             | Paper-based Skin Patch        | Reference methods                    |                                                |
|-------------------------------------------|-------------|-------------------------------|--------------------------------------|------------------------------------------------|
|                                           |             |                               | Gibson-Cooke QPIT                    | Wescor Macroduct Sweat-Chek system             |
| Analytical Targets                        |             | Anions                        | Chloride                             | Anions                                         |
| Detection mechanism                       |             | Colorimetric                  | Coulometry                           | Conductivity                                   |
| Overall Coefficient of Variation          |             | ~ 15%                         | < 5% <sup>a</sup>                    | < 2 % <sup>b</sup>                             |
| Coefficient of Determination <sup>c</sup> |             | 0.97                          | 0.99                                 | NA                                             |
| Dynamic Range                             |             | 0 to 140 mM (equivalent NaCl) | 30 to 900 mM <sup>a</sup>            | 0 to 150 mmol/L (equivalent NaCl) <sup>b</sup> |
| Assay Time (min)                          | Stimulation | 5                             |                                      |                                                |
|                                           | Collection  |                               | 38 to 95 <sup>d</sup>                | 38 to 71 <sup>d</sup>                          |
|                                           | Detection   | ~ 5                           |                                      |                                                |
| Cost (US \$)                              |             | ~ 0.62 <sup>f</sup>           | 22 <sup>d</sup> ;<br>17 <sup>e</sup> | 20 <sup>d</sup> ;<br>32 <sup>e</sup>           |

<sup>a</sup> Product data sheet of ABL 850L; <sup>b</sup> Product data sheet of Sweat-Chek Analyzer; <sup>c</sup> Standard chloride solutions in Fig. 2. <sup>d</sup> J Pediatr (Rio J), 2010, 86(2): 109-114; <sup>e</sup> Clin. Biochem., 2009, 42: 1260–1264; <sup>f</sup> Details in Table S2;

**Table S2. Shelf life and material cost of the skin patch**

|                             | Shelf life <sup>a</sup> | Quantity   | Cost (US \$) | For one skin patch |               |
|-----------------------------|-------------------------|------------|--------------|--------------------|---------------|
|                             |                         |            |              | Quantity           | Cost (US \$)  |
| <b>Tegaderm 1624W</b>       | 3 years                 | One piece  | 0.5          | One piece          | 0.5           |
| <b>Hydrochromic ink</b>     | > 12 months below 30 °C | 25 mL      | 16           | 100 µL             | 0.064         |
| <b>Anion exchange Paper</b> | NA                      | 400 pieces | 102.28       | One-sixth piece    | 0.043         |
| <b>Adhesive Tape</b>        | NA                      | 32.9 meter | 2.67         | 50 mm              | 0.004         |
| <b>Chr 1 paper</b>          | NA                      | 100 meter  | 30.57        | 5 mm               | 0.0015        |
| <b>pH test Paper (1-14)</b> | NA                      | 80 pieces  | 0.17         | One-third piece    | Negligible    |
| <b>Sum</b>                  | <b>1 year</b>           |            |              |                    | <b>~ 0.62</b> |

<sup>a</sup> Product data sheets.

**Table S 3. Clinical comparison of the skin patch and the reference method <sup>a</sup>**

| Patients | Age | Gender | Clinical Diagnosis           |                        | Diagnostic Accuracy |
|----------|-----|--------|------------------------------|------------------------|---------------------|
|          |     |        | Skin patch<br>(80 mM cutoff) | QPIT<br>(60 mM cutoff) |                     |
| A        | 16  | Female | Non-CF                       | Non-CF                 | Consistency         |
| B        | 31  | Female | Non-CF                       | Non-CF                 | Consistency         |
| C        | 40  | Female | Non-CF                       | Non-CF                 | Consistency         |
| D        | 29  | Male   | Non-CF                       | Non-CF                 | Consistency         |
| E        | 14  | Male   | Non-CF                       | Non-CF                 | Consistency         |
| F        | 39  | Female | Non-CF                       | Non-CF                 | Consistency         |
| G        | 11  | Male   | CF                           | CF                     | Consistency         |
| H        | 10  | Female | CF                           | CF                     | Consistency         |

<sup>a</sup> Respirology, 2015, 20, 312.**Table S4. Recovery of the instrumental analyzer for detecting chloride <sup>a</sup>**

| Chloride<br>Concentraion (mM) | 10             | 20 | 30 | 40 | 50 | 60 | 70 | 80 | 100 | 120 | 140 |
|-------------------------------|----------------|----|----|----|----|----|----|----|-----|-----|-----|
| Recovery (%)                  | 0 <sup>b</sup> | 65 | 76 | 82 | 86 | 90 | 94 | 91 | 92  | 95  | 94  |

<sup>a</sup> ABL 850L; <sup>b</sup> Not detecable
